# Supplementary material for: Novel enantiomorphic Pb-coordination polymers dictated by the corresponding chiral ligands, [Pb((R,R)-TBA)(H2O)]·1.7H2O and [Pb((S,S)-TBA)(H2O)]·1.7H2O [TBA = 1,3,5-triazin-2(1H)-one-4,6-bis(alanyl)]
Source: Royal Society of Chemistry journal article supplement (doi:10.1039/d0qm00629g), 2020-10-09
Supplement: d0qm00629g1.pdf [file d0qm00629g1.pdf]

Electronic supplementary information (ESI) for

**Novel enantiomorphous Pb-coordination polymers dictated  
by the corresponding chiral ligands, [Pb((*R,R*)-  
*TBA*)(H<sub>2</sub>O)]·1.7H<sub>2</sub>O and [Pb((*S,S*)-*TBA*)(H<sub>2</sub>O)]·1.7H<sub>2</sub>O  
[*TBA* = 1,3,5-triazin-2(1H)-one-4,6-bis(alanyl)]**

*Yunseung Kuk and Kang Min Ok\**

Department of Chemistry, Sogang University, Seoul 04107, Republic of Korea

\*E-mail: kmok@sogang.ac.kr

| Sections           | Titles                                                                                                                                                                                                                   | Pages  |
|--------------------|--------------------------------------------------------------------------------------------------------------------------------------------------------------------------------------------------------------------------|--------|
| <b>Figure S1.</b>  | $^1\text{H}$ and $^{13}\text{C}$ NMR spectra for (a) ( <i>S,S</i> )- <i>TBA</i> and (b) ( <i>R,R</i> )- <i>TBA</i> .                                                                                                     | S3–S4  |
| <b>Figure S2.</b>  | Ball-and-stick models of <b>R1</b> (left) and <b>S1</b> (right) in the <i>bc</i> -plane.                                                                                                                                 | S5     |
| <b>Figure S3.</b>  | SEM-EDX data for <b>R1</b> and <b>S1</b> .                                                                                                                                                                               | S6     |
| <b>Figure S4.</b>  | Calculated and experimental powder X-ray diffraction patterns for <b>R1</b> and <b>S1</b> .                                                                                                                              | S7     |
| <b>Figure S5.</b>  | Infrared spectra for <b>R1</b> , <b>S1</b> , ( <i>R,R</i> )- <i>TBA</i> , and ( <i>S,S</i> )- <i>TBA</i> .                                                                                                               | S8     |
| <b>Figure S6.</b>  | Thermogravimetric analysis diagrams and PXRD data at different temperatures for <b>R1</b> and <b>S1</b> .                                                                                                                | S9–S10 |
| <b>Figure S7.</b>  | UV-vis spectra for <b>R1</b> , <b>S1</b> , ( <i>R,R</i> )- <i>TBA</i> , and ( <i>S,S</i> )- <i>TBA</i> .                                                                                                                 | S11    |
| <b>Figure S8.</b>  | Partial density of state (PDOS) calculations of (a) <b>R1</b> and (b) <b>S1</b> . The Fermi level is represented at 0 eV.                                                                                                | S12    |
| <b>Figure S9.</b>  | Gas adsorption isotherms of $\text{N}_2$ (blue) and $\text{CO}_2$ (red) on <b>S1</b> and PXRD patterns for <b>S1</b> after the degassing process.                                                                        | S13    |
| <b>Figure S10.</b> | PXRD patterns after immersion into the (a) $\text{H}_2\text{SO}_4$ (pH = 0) and (b) $\text{KOH}$ (pH = 14) solutions.                                                                                                    | S14    |
| <b>Figure S11.</b> | UV-vis spectra of CR dye solutions and adsorption maximum capacity ( $q_{max}$ ).                                                                                                                                        | S15    |
| <b>Figure S12.</b> | Congo red (CR), indigo carmine (IC), methyl orange (MO), and rhodamine B (RhB) structure and ball-and-stick model (light yellow, $\text{Na}^+$ ; green, $\text{Cl}^-$ ; black, C; blue, N; red, O; yellow, S; white, H). | S16    |
| <b>Figure S13.</b> | UV-vis spectra of (a) MO, (b) RhB, and (c) IC dye solutions.                                                                                                                                                             | S17    |
| <b>Figure S14.</b> | UV-vis spectra for CR solutions (a) at various particle sizes, (b) at pH 2, 3, and (c) 4, 5, 7, and 11.                                                                                                                  | S17    |
| <b>Table S1.</b>   | Bond lengths [ $\text{\AA}$ ] and angles [ $^\circ$ ] for <b>R1</b> .                                                                                                                                                    | S18    |
| <b>Table S2.</b>   | Bond lengths [ $\text{\AA}$ ] and angles [ $^\circ$ ] for <b>S1</b> .                                                                                                                                                    | S19    |
| <b>Table S3.</b>   | Hydrogen bond distances for <b>R1</b> and <b>S1</b> .                                                                                                                                                                    | S20    |
| <b>Table S4.</b>   | Maximum adsorption capacity for CR on various adsorbents.                                                                                                                                                                | S21    |
| <b>Table S5.</b>   | Zeta potential values for <b>S1</b> under the various pH conditions.                                                                                                                                                     | S22    |
| <b>Table S6.</b>   | pH values of aqueous $\text{H}_2\text{SO}_4$ solutions before and after immersion.                                                                                                                                       | S22    |
| <b>Table S7.</b>   | Elemental analysis of <b>S1</b> and <b>S1</b> immersed in $\text{H}_2\text{SO}_4$ .                                                                                                                                      | S23    |
| <b>Figure S15.</b> | Infrared spectra for <b>S1</b> and <b>S1</b> immersed in $\text{H}_2\text{SO}_4$ .                                                                                                                                       | S23    |
| <b>References</b>  |                                                                                                                                                                                                                          | S24    |

Figure S1.  $^1\text{H}$  and  $^{13}\text{C}$  NMR spectra for (a) (*S,S*)-TBA and (b) (*R,R*)-TBA.

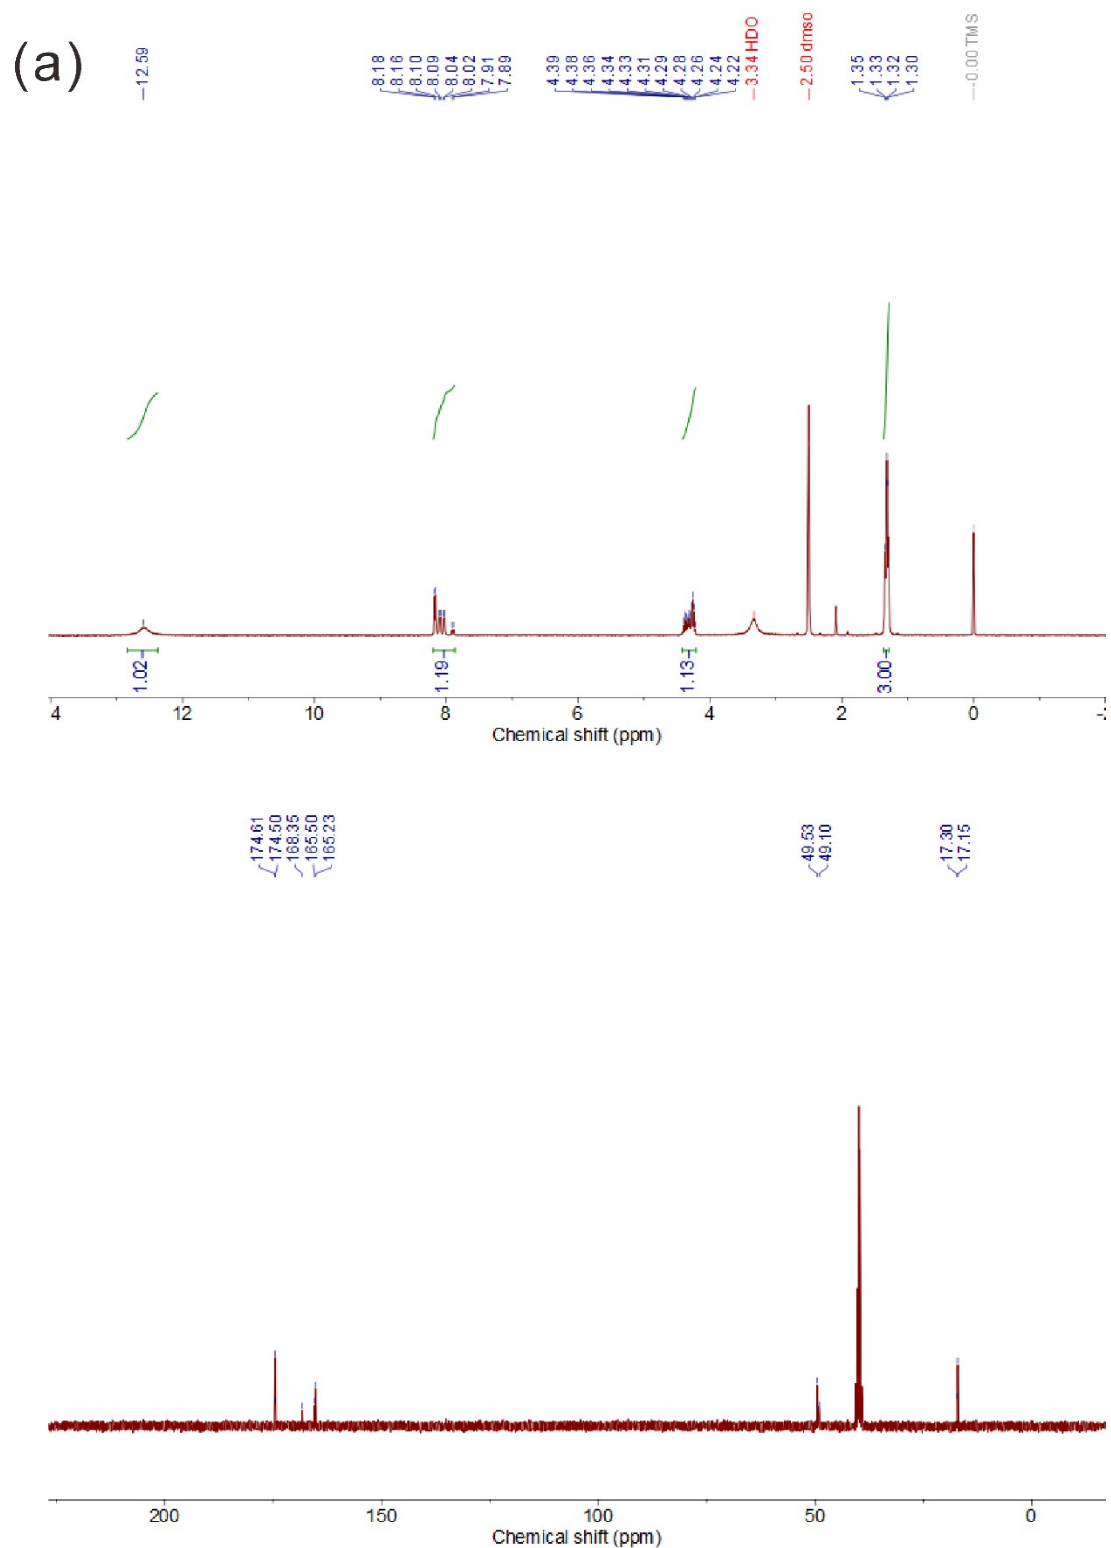

(b)

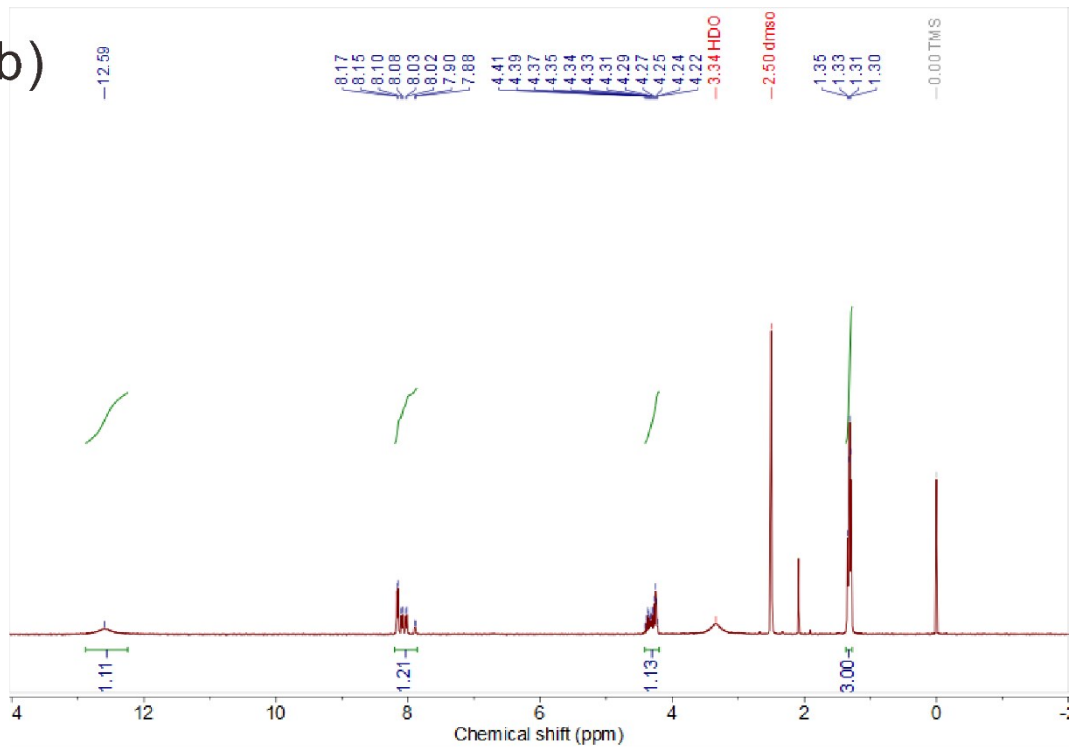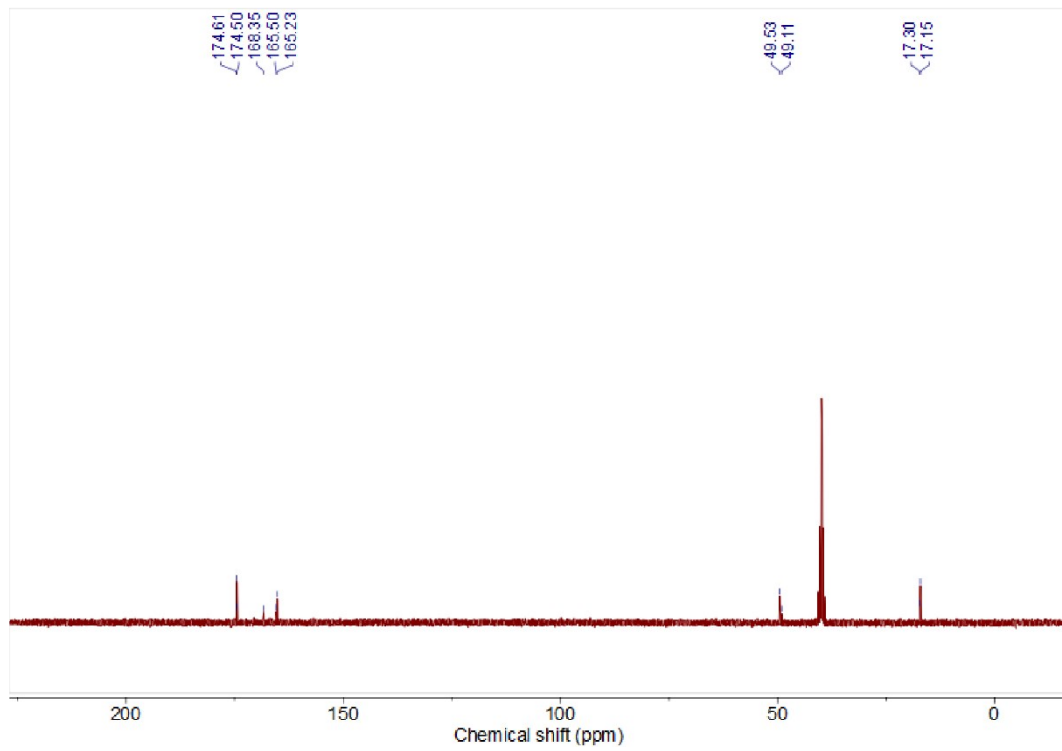

**Figure S2.** Ball-and-stick models of **R1** (left) and **S1** (right) in the *bc*-plane.

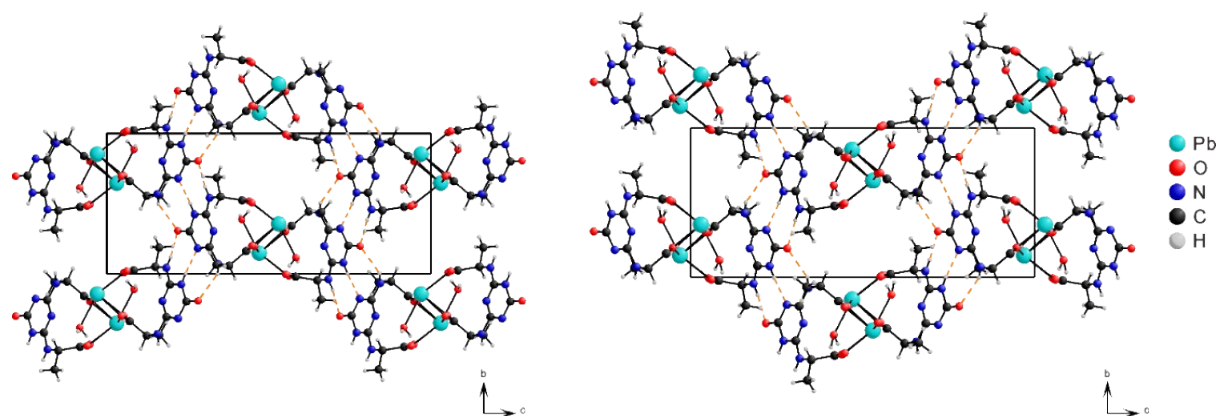

**Figure S3.** SEM-EDX data for **R1** and **S1**.

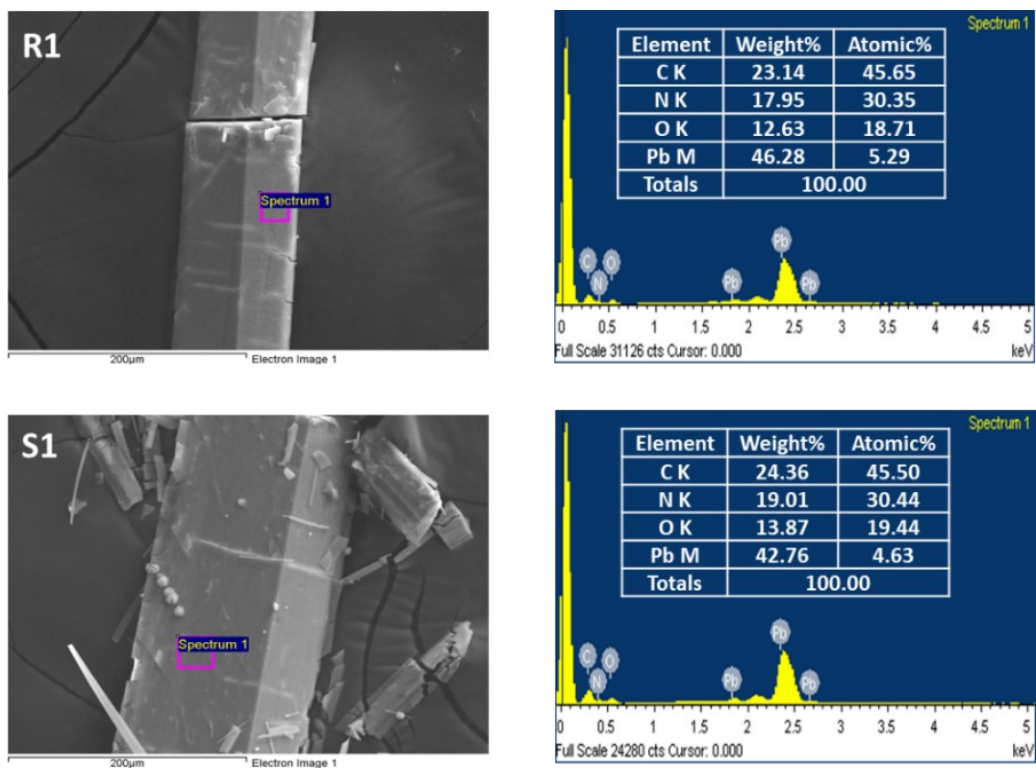

**Figure S4.** Calculated and experimental powder X-ray diffraction patterns for **R1** and **S1**.

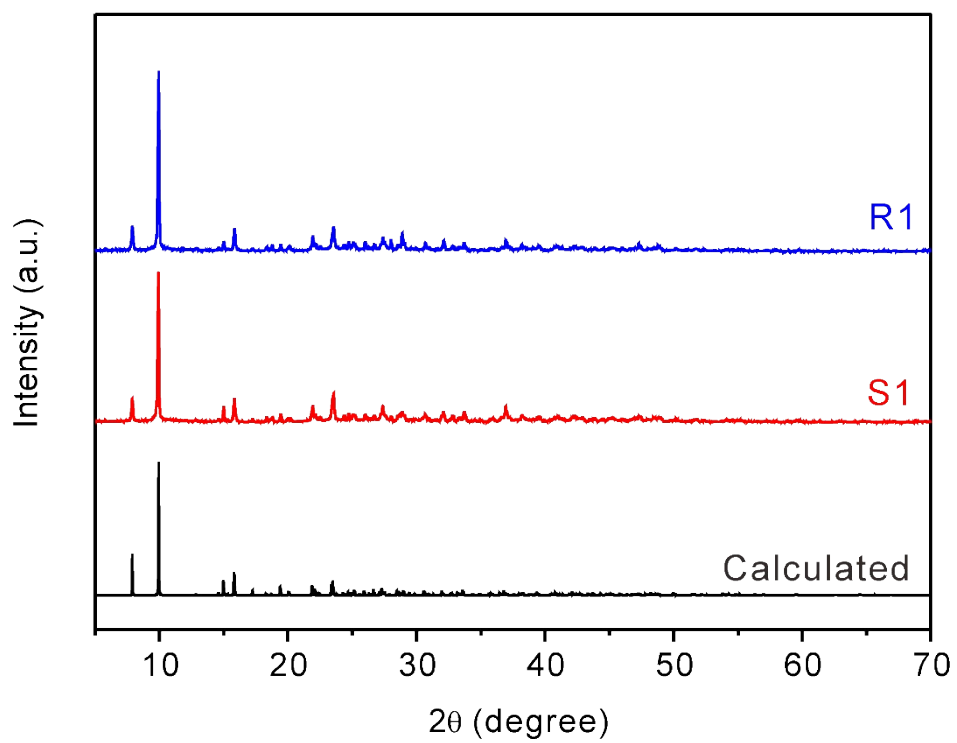

**Figure S5.** Infrared spectra for **R1**, **S1**, (*R,R*)-*TBA*, and (*S,S*)-*TBA*.

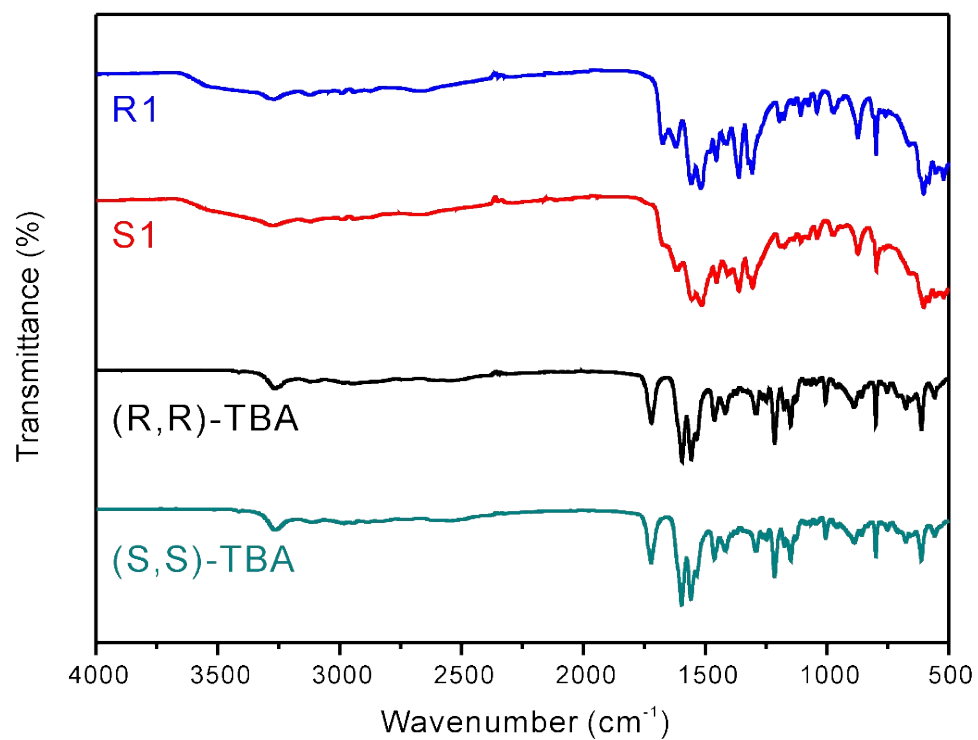



**Figure S6.** Thermogravimetric analysis diagrams and PXRD data at different temperatures for **R1** and **S1**.

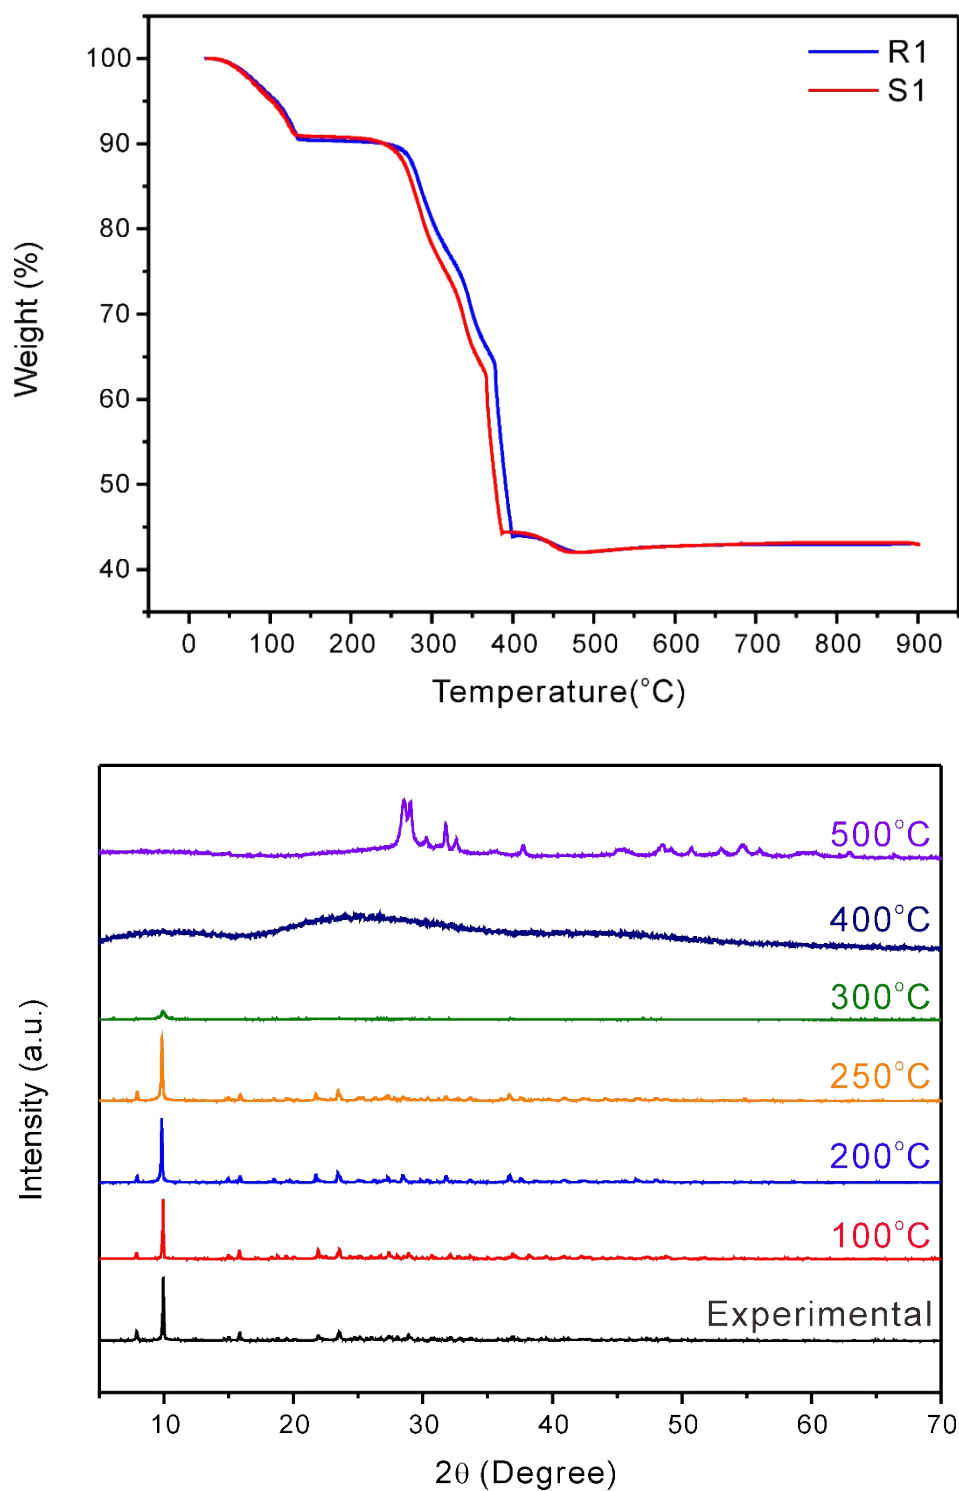

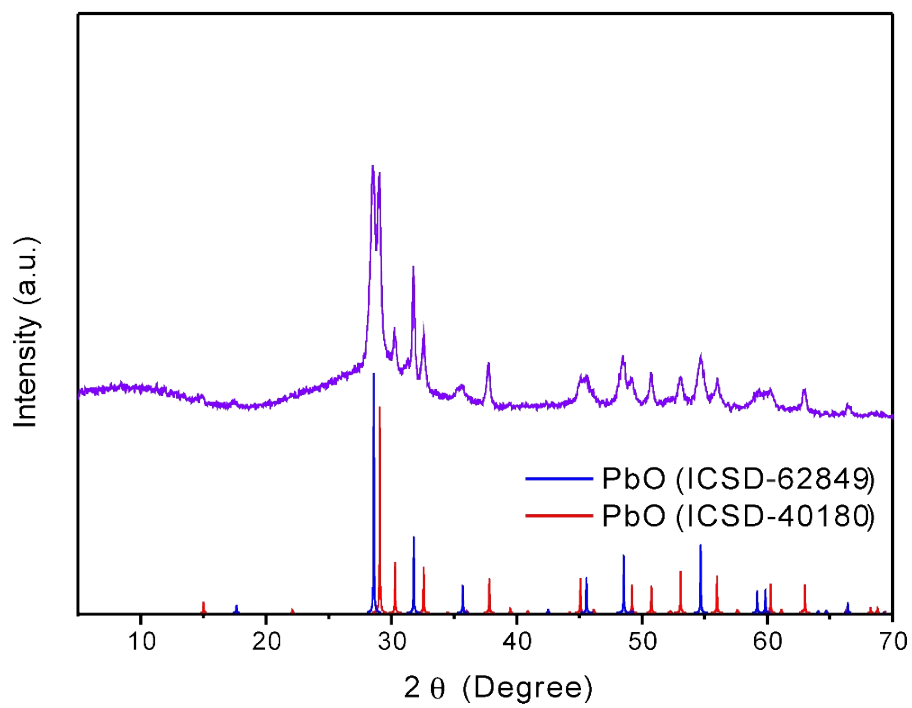

**Figure S7.** UV-vis spectra for **R1**, **S1**, (*R,R*)-TBA, and (*S,S*)-TBA.

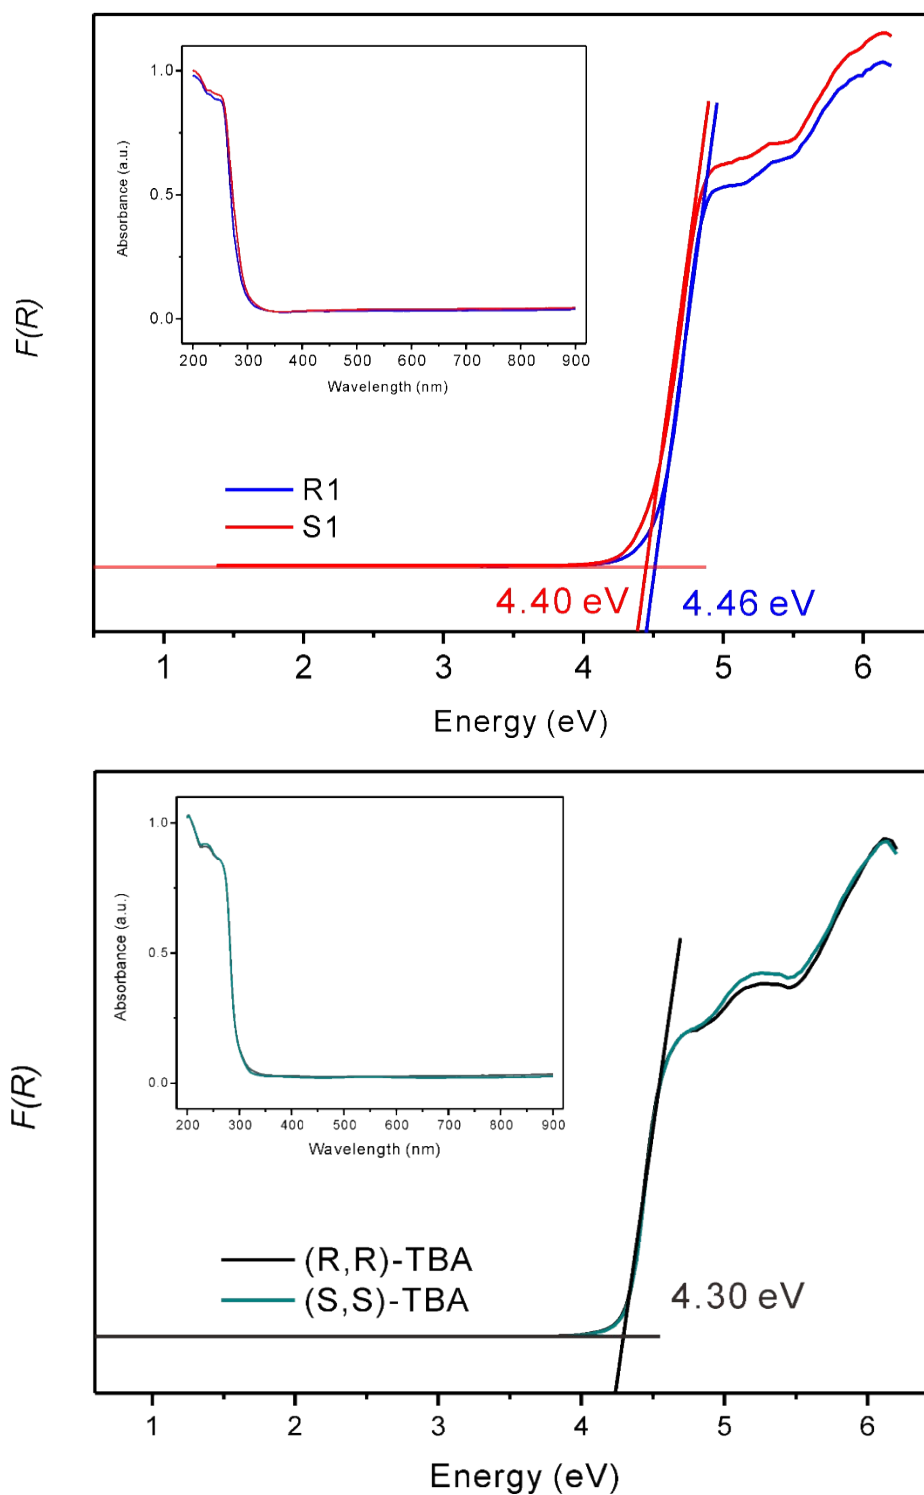

**Figure S8.** Partial density of state (PDOS) calculations of (a) **R1** and (b) **S1**. The Fermi level is represented at 0 eV.

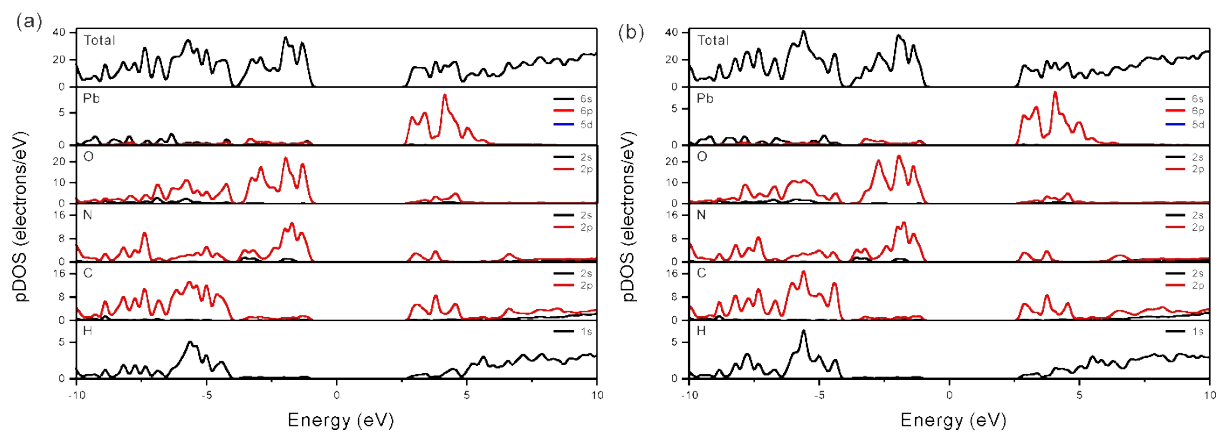

**Figure S9.** Gas adsorption isotherms of N<sub>2</sub> (blue) and CO<sub>2</sub> (red) on **S1** and PXRD patterns for **S1** after the degassing process.

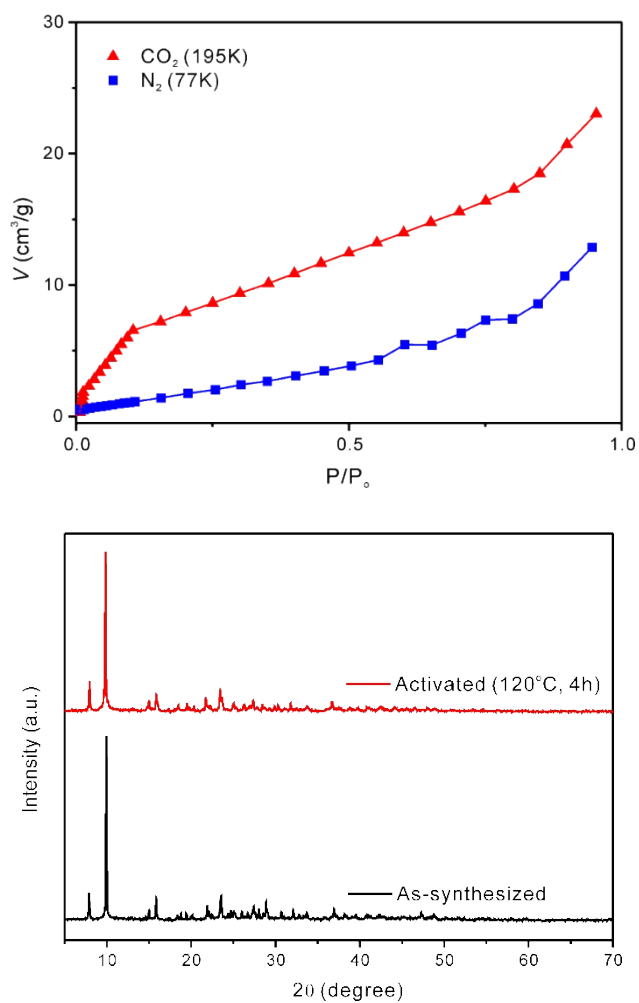

**Figure S10.** PXRD patterns after immersion into the (a)  $\text{H}_2\text{SO}_4$  (pH = 0) and (b)  $\text{KOH}$  (pH = 14) solutions.

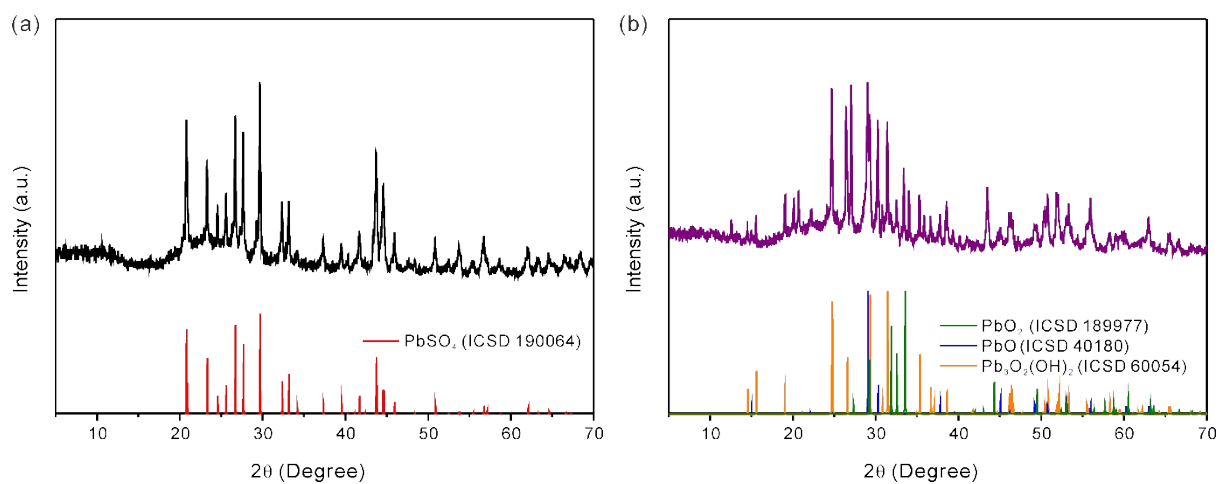

**Figure S11.** UV-vis spectra of CR dye solutions and adsorption maximum capacity ( $q_{max}$ ).

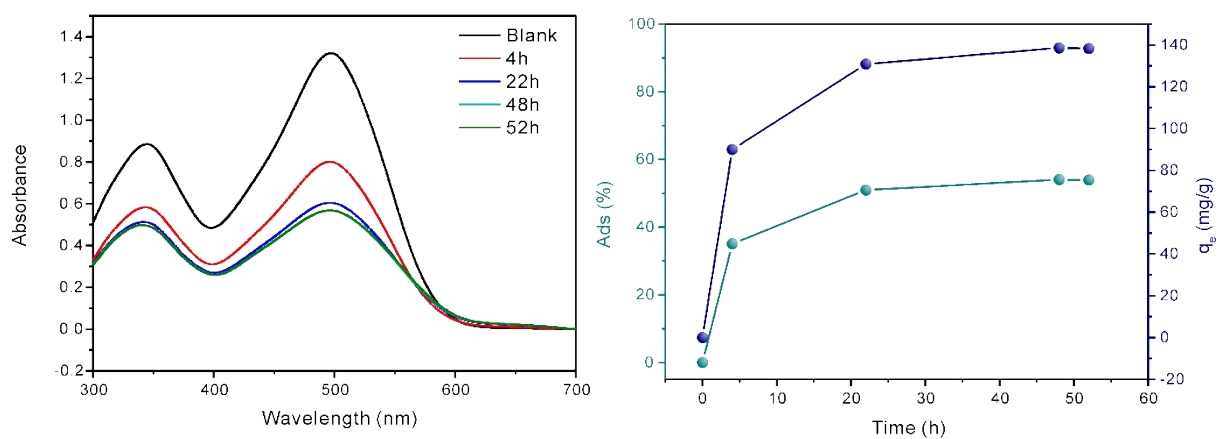

**Figure S12.** Congo red (CR), indigo carmine (IC), methyl orange (MO), and rhodamine B (RhB) structure and ball-and-stick model (light yellow, Na<sup>+</sup>; green, Cl<sup>-</sup>; black, C; blue, N; red, O; yellow, S; white, H).

| Name | Structure                                                                           | Ball-and-stick model                                                                 |
|------|-------------------------------------------------------------------------------------|--------------------------------------------------------------------------------------|
| CR   | 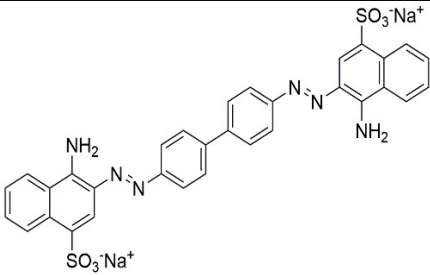   |    |
| IC   |    |    |
| MO   |   |   |
| RhB  |  |  |



**Figure S13.** UV-vis spectra of (a) MO, (b) RhB, and (c) IC dye solutions.

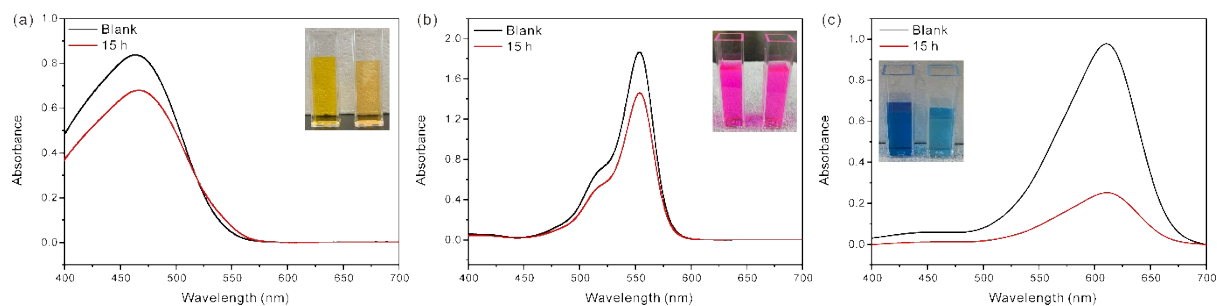

**Figure S14.** UV-vis spectra for CR solutions (a) at various particle sizes, (b) at pH 2, 3, and (c) 4, 5, 7, and 11.

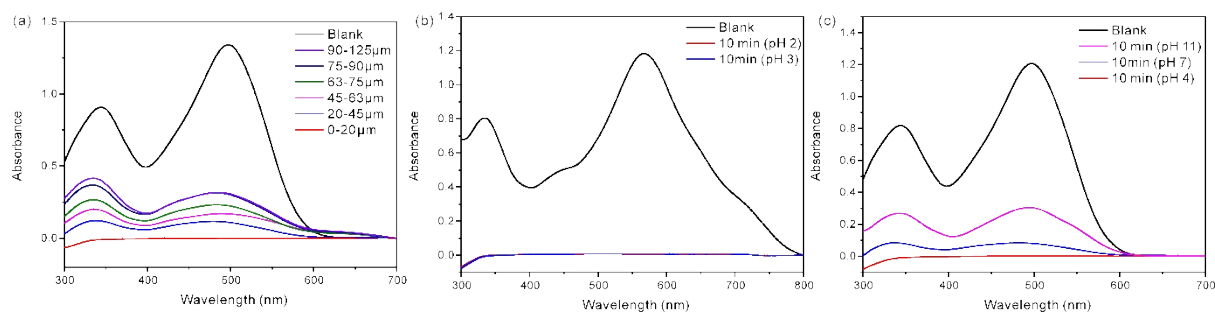

**Table S1.** Bond lengths [ $\text{\AA}$ ] and angles [ $^\circ$ ] for **R1**.

| Selected bond distances ( $\text{\AA}$ )                               |            |                 |           |
|------------------------------------------------------------------------|------------|-----------------|-----------|
| Pb(1)–O(2)#1                                                           | 2.495(7)   | N(1)–C(3)       | 1.339(10) |
| Pb(1)–O(2)                                                             | 2.518(7)   | N(2)–C(1)       | 1.359(11) |
| Pb(1)–O(1)                                                             | 2.558(8)   | N(2)–C(2)       | 1.373(12) |
| Pb(1)–O(5)                                                             | 2.597(8)   | N(3)–C(3)       | 1.343(10) |
| Pb(1)–O(3)                                                             | 2.606(10)  | N(3)–C(2)       | 1.352(11) |
| Pb(1)–O(1)#2                                                           | 2.697(8)   | N(4)–C(3)       | 1.363(11) |
| Pb(1)–O(4)                                                             | 2.795(10)  | N(4)–C(4)       | 1.453(11) |
| O(1)–C(8)                                                              | 1.233(11)  | N(5)–C(1)       | 1.325(11) |
| O(2)–C(8)                                                              | 1.239(10)  | N(5)–C(5)       | 1.460(11) |
| O(3)–C(9)                                                              | 1.248(13)  | C(4)–C(6)       | 1.520(14) |
| O(4)–C(9)                                                              | 1.241(13)  | C(4)–C(8)       | 1.531(11) |
| O(6)–C(2)                                                              | 1.242(12)  | C(5)–C(7)       | 1.491(14) |
| N(1)–C(1)                                                              | 1.334(11)  | C(5)–C(9)       | 1.513(13) |
| Selected bond angle ( $^\circ$ )                                       |            |                 |           |
| O(2)#1–Pb(1)–O(2)                                                      | 114.31(15) | C(9)–O(4)–Pb(1) | 87.1(6)   |
| O(2)#1–Pb(1)–O(1)                                                      | 66.7(2)    | C(1)–N(1)–C(3)  | 114.8(7)  |
| O(2)–Pb(1)–O(1)                                                        | 49.9(2)    | C(1)–N(2)–C(2)  | 121.3(7)  |
| O(2)#1–Pb(1)–O(5)                                                      | 76.7(2)    | C(3)–N(3)–C(2)  | 116.3(7)  |
| O(2)–Pb(1)–O(5)                                                        | 76.6(2)    | C(3)–N(4)–C(4)  | 122.8(7)  |
| O(1)–Pb(1)–O(5)                                                        | 79.2(3)    | C(1)–N(5)–C(5)  | 122.3(7)  |
| O(2)#1–Pb(1)–O(3)                                                      | 77.3(2)    | N(5)–C(1)–N(1)  | 119.9(8)  |
| O(2)–Pb(1)–O(3)                                                        | 94.0(3)    | N(5)–C(1)–N(2)  | 118.9(8)  |
| O(1)–Pb(1)–O(3)                                                        | 69.8(3)    | N(1)–C(1)–N(2)  | 121.2(8)  |
| O(5)–Pb(1)–O(3)                                                        | 145.5(3)   | O(6)–C(2)–N(3)  | 122.7(8)  |
| O(2)#1–Pb(1)–O(1)#2                                                    | 151.7(3)   | O(6)–C(2)–N(2)  | 118.9(8)  |
| O(2)–Pb(1)–O(1)#2                                                      | 64.3(2)    | N(3)–C(2)–N(2)  | 118.4(8)  |
| O(1)–Pb(1)–O(1)#2                                                      | 113.13(19) | N(1)–C(3)–N(3)  | 127.7(7)  |
| O(5)–Pb(1)–O(1)#2                                                      | 75.6(3)    | N(1)–C(3)–N(4)  | 116.5(7)  |
| O(3)–Pb(1)–O(1)#2                                                      | 130.3(3)   | N(3)–C(3)–N(4)  | 115.8(7)  |
| O(2)#1–Pb(1)–O(4)                                                      | 124.9(2)   | N(4)–C(4)–C(6)  | 113.8(8)  |
| O(2)–Pb(1)–O(4)                                                        | 71.6(2)    | N(4)–C(4)–C(8)  | 112.0(7)  |
| O(1)–Pb(1)–O(4)                                                        | 87.1(3)    | C(6)–C(4)–C(8)  | 112.2(8)  |
| O(5)–Pb(1)–O(4)                                                        | 147.0(3)   | N(5)–C(5)–C(7)  | 109.4(9)  |
| O(3)–Pb(1)–O(4)                                                        | 47.7(2)    | N(5)–C(5)–C(9)  | 112.2(8)  |
| O(1)#2–Pb(1)–O(4)                                                      | 82.6(3)    | C(7)–C(5)–C(9)  | 111.8(9)  |
| C(8)–O(1)–Pb(1)                                                        | 94.0(5)    | O(1)–C(8)–O(2)  | 120.2(7)  |
| C(8)–O(1)–Pb(1)#1                                                      | 150.0(7)   | O(1)–C(8)–C(4)  | 119.0(8)  |
| Pb(1)–O(1)–Pb(1)#1                                                     | 110.3(3)   | O(2)–C(8)–C(4)  | 120.6(7)  |
| C(8)–O(2)–Pb(1)#2                                                      | 144.6(6)   | O(4)–C(9)–O(3)  | 123.5(9)  |
| C(8)–O(2)–Pb(1)                                                        | 95.8(5)    | O(4)–C(9)–C(5)  | 121.0(9)  |
| Pb(1)#2–O(2)–Pb(1)                                                     | 118.7(3)   | O(3)–C(9)–C(5)  | 115.5(9)  |
| C(9)–O(3)–Pb(1)                                                        | 95.8(7)    |                 |           |
| Symmetry operation : #1 $x-1/2, -y+1/2, -z+1$ #2 $x+1/2, -y+1/2, -z+1$ |            |                 |           |

**Table S2.** Bond lengths [ $\text{\AA}$ ] and angles [ $^\circ$ ] for **S1**.

| Selected bond distances ( $\text{\AA}$ )                                 |            |                 |           |
|--------------------------------------------------------------------------|------------|-----------------|-----------|
| Pb(1)–O(1)#1                                                             | 2.516(7)   | N(1)–C(3)       | 1.344(13) |
| Pb(1)–O(1)                                                               | 2.532(8)   | N(2)–C(1)       | 1.368(12) |
| Pb(1)–O(2)                                                               | 2.575(8)   | N(2)–C(2)       | 1.388(13) |
| Pb(1)–O(5)                                                               | 2.599(9)   | N(3)–C(2)       | 1.353(13) |
| Pb(1)–O(4)                                                               | 2.617(11)  | N(3)–C(3)       | 1.361(12) |
| Pb(1)–O(2)#2                                                             | 2.713(8)   | N(4)–C(3)       | 1.378(13) |
| Pb(1)–O(3)                                                               | 2.774(10)  | N(4)–C(4)       | 1.461(12) |
| O(1)–C(8)                                                                | 1.255(12)  | N(5)–C(1)       | 1.326(13) |
| O(2)–C(8)                                                                | 1.242(12)  | N(5)–C(5)       | 1.457(13) |
| O(3)–C(9)                                                                | 1.249(15)  | C(4)–C(8)       | 1.516(13) |
| O(4)–C(9)                                                                | 1.249(14)  | C(4)–C(6)       | 1.549(15) |
| O(6)–C(2)                                                                | 1.250(13)  | C(5)–C(7)       | 1.507(17) |
| N(1)–C(1)                                                                | 1.328(13)  | C(5)–C(9)       | 1.553(15) |
| Selected bond angle ( $^\circ$ )                                         |            |                 |           |
| O(1)#1–Pb(1)–O(1)                                                        | 114.23(16) | C(9)–O(4)–Pb(1) | 94.8(7)   |
| O(1)#1–Pb(1)–O(2)                                                        | 66.5(2)    | C(1)–N(1)–C(3)  | 115.4(8)  |
| O(1)–Pb(1)–O(2)                                                          | 49.9(2)    | C(1)–N(2)–C(2)  | 120.7(9)  |
| O(1)#1–Pb(1)–O(5)                                                        | 76.5(3)    | C(2)–N(3)–C(3)  | 116.2(9)  |
| O(1)–Pb(1)–O(5)                                                          | 76.9(3)    | C(3)–N(4)–C(4)  | 122.6(9)  |
| O(2)–Pb(1)–O(5)                                                          | 79.1(3)    | C(1)–N(5)–C(5)  | 122.0(9)  |
| O(1)#1–Pb(1)–O(4)                                                        | 77.5(3)    | N(5)–C(1)–N(1)  | 120.4(9)  |
| O(1)–Pb(1)–O(4)                                                          | 94.0(3)    | N(5)–C(1)–N(2)  | 118.1(9)  |
| O(2)–Pb(1)–O(4)                                                          | 70.2(3)    | N(1)–C(1)–N(2)  | 121.5(9)  |
| O(5)–Pb(1)–O(4)                                                          | 145.7(3)   | O(6)–C(2)–N(3)  | 122.6(10) |
| O(1)#1–Pb(1)–O(2)#2                                                      | 151.9(3)   | O(6)–C(2)–N(2)  | 118.7(10) |
| O(1)–Pb(1)–O(2)#2                                                        | 64.2(2)    | N(3)–C(2)–N(2)  | 118.7(9)  |
| O(2)–Pb(1)–O(2)#2                                                        | 113.07(19) | N(1)–C(3)–N(3)  | 127.1(9)  |
| O(5)–Pb(1)–O(2)#2                                                        | 75.9(3)    | N(1)–C(3)–N(4)  | 117.7(8)  |
| O(4)–Pb(1)–O(2)#2                                                        | 130.0(3)   | N(3)–C(3)–N(4)  | 115.2(9)  |
| O(1)#1–Pb(1)–O(3)                                                        | 125.5(2)   | N(4)–C(4)–C(8)  | 113.2(8)  |
| O(1)–Pb(1)–O(3)                                                          | 71.5(3)    | N(4)–C(4)–C(6)  | 111.9(9)  |
| O(2)–Pb(1)–O(3)                                                          | 87.8(3)    | C(8)–C(4)–C(6)  | 112.5(10) |
| O(5)–Pb(1)–O(3)                                                          | 147.0(3)   | N(5)–C(5)–C(7)  | 110.4(10) |
| O(4)–Pb(1)–O(3)                                                          | 48.2(2)    | N(5)–C(5)–C(9)  | 112.1(9)  |
| O(2)#2–Pb(1)–O(3)                                                        | 81.8(3)    | C(7)–C(5)–C(9)  | 111.6(10) |
| C(8)–O(1)–Pb(1)#2                                                        | 144.0(7)   | O(2)–C(8)–O(1)  | 119.4(8)  |
| C(8)–O(1)–Pb(1)                                                          | 96.1(6)    | O(2)–C(8)–C(4)  | 119.8(9)  |
| Pb(1)#2–O(1)–Pb(1)                                                       | 118.8(3)   | O(1)–C(8)–C(4)  | 120.6(9)  |
| C(8)–O(2)–Pb(1)                                                          | 94.4(6)    | O(4)–C(9)–O(3)  | 124.1(10) |
| C(8)–O(2)–Pb(1)#1                                                        | 149.8(8)   | O(4)–C(9)–C(5)  | 115.0(11) |
| Pb(1)–O(2)–Pb(1)#1                                                       | 110.5(3)   | O(3)–C(9)–C(5)  | 120.9(11) |
| C(9)–O(3)–Pb(1)                                                          | 87.5(7)    |                 |           |
| Symmetry operation : #1 $x-1/2, -y+3/2, -z+1$ ; #2 $x+1/2, -y+3/2, -z+1$ |            |                 |           |

**Table S3.** Hydrogen bond distances for **R1** and **S1**.

| Hydrogen bond distances (Å)                                                                                                    |                     |          |           |
|--------------------------------------------------------------------------------------------------------------------------------|---------------------|----------|-----------|
| Name                                                                                                                           | D–H···A             | d(H···A) | d(D···A)  |
| <b>R1</b>                                                                                                                      | O(5)–H(5D)···O(4)#1 | 1.95(8)  | 2.849(12) |
|                                                                                                                                | O(5)–H(5C)···O(3)#2 | 2.09     | 2.818(12) |
|                                                                                                                                | N(2)–H(2)···N(3)#3  | 2.09     | 2.859(10) |
|                                                                                                                                | N(5)–H(5)···O(6)#3  | 2.07     | 2.921(10) |
|                                                                                                                                | N(4)–H(4)···O(6)#4  | 2.29     | 2.993(10) |
| Symmetry operation : #1 $x-1/2, -y+1/2, -z+1$ ; #2 $x+1/2, -y+1/2, -z+1$ ; #3 $-x+1, y+1/2, -z+1/2$ ; #4 $-x+1, y-1/2, -z+1/2$ |                     |          |           |
| Hydrogen bond distances (Å)                                                                                                    |                     |          |           |
| Name                                                                                                                           | D–H···A             | d(H···A) | d(D···A)  |
| <b>S1</b>                                                                                                                      | O(5)–H(5C)···O(3)#1 | 1.92(5)  | 2.864(13) |
|                                                                                                                                | O(5)–H(5D)···O(4)#2 | 2.22(11) | 2.860(13) |
|                                                                                                                                | N(2)–H(2)···N(3)#3  | 2.03     | 2.890(12) |
|                                                                                                                                | N(5)–H(5)···O(6)#3  | 2.09     | 2.952(13) |
|                                                                                                                                | N(4)–H(4)···O(6)#4  | 2.29     | 3.013(12) |
| Symmetry operation : #1 $x-1/2, -y+3/2, -z+1$ ; #2 $x+1/2, -y+3/2, -z+1$ ; #3 $-x+1, y-1/2, -z+1/2$ ; #4 $-x+1, y+1/2, -z+1/2$ |                     |          |           |

**Table S4.** Maximum adsorption capacity for CR on various adsorbents.

| Adsorbents (MOFs)                                                                                                                             | $q_{max}$ (mg g <sup>-1</sup> ) | Surface area (m <sup>2</sup> g <sup>-1</sup> ) <sup>a</sup> | Ref.      |
|-----------------------------------------------------------------------------------------------------------------------------------------------|---------------------------------|-------------------------------------------------------------|-----------|
| [Pb((S,S)-TBA)(H <sub>2</sub> O)] · 1.7H <sub>2</sub> O                                                                                       | 138.57                          | 10.55                                                       | This work |
| Zn-TDPAT                                                                                                                                      | 16.72                           | X                                                           | [1]       |
| Fe <sub>3</sub> O <sub>4</sub> @SiO <sub>2</sub> @Zn-TDPAT                                                                                    | 17.73                           | X                                                           | [1]       |
| [Zn(BDC)(TIB)] · 3H <sub>2</sub> O                                                                                                            | 60.2                            | X                                                           | [2]       |
| ZIF-8@CoFe <sub>2</sub> O <sub>4</sub>                                                                                                        | 64.48                           | 918.9                                                       | [3]       |
| Co-BDC (MOF-4)                                                                                                                                | 64.56                           | 0.9113                                                      | [4]       |
| TMU-4                                                                                                                                         | 72                              | 518                                                         | [5]       |
| Cu-BDC (MOF-3)                                                                                                                                | 77.05                           | 89.9110                                                     | [4]       |
| TMU-9                                                                                                                                         | 92                              | X                                                           | [6]       |
| In-MOFs-2                                                                                                                                     | 92.29                           | 7.3480                                                      | [7]       |
| AIF                                                                                                                                           | 93.45                           | 973.39                                                      | [8]       |
| TMU-34                                                                                                                                        | 94                              | 540                                                         | [5]       |
| GO/In-MOFs-2                                                                                                                                  | 96.72                           | 10.8585                                                     | [7]       |
| TMU-8                                                                                                                                         | 97.3                            | X                                                           | [6]       |
| AIF-GO                                                                                                                                        | 102.04                          | 917.79                                                      | [8]       |
| In-MOFs-1                                                                                                                                     | 103.54                          | 21.1983                                                     | [7]       |
| GO/In-MOFs-1                                                                                                                                  | 108.54                          | 14.3261                                                     | [7]       |
| SALE-TMU-34                                                                                                                                   | 112                             | 720                                                         | [5]       |
| Cu-BTC (MOF-1)                                                                                                                                | 120.15                          | 32.0708                                                     | [4]       |
| Co-BTC (MOF-2)                                                                                                                                | 129.95                          | 7.7682                                                      | [4]       |
| USALE-TMU-34                                                                                                                                  | 138                             | 830                                                         | [5]       |
| AIF-rGO                                                                                                                                       | 178.57                          | 951.88                                                      | [8]       |
| ZIF-67@C-MOF-74                                                                                                                               | 180                             | 753                                                         | [9]       |
| [Ni <sub>2</sub> F <sub>2</sub> (4,4'-bipy) <sub>2</sub> (H <sub>2</sub> O) <sub>2</sub> ][VO <sub>3</sub> ] <sub>2</sub> · 8H <sub>2</sub> O | 242.1                           | X                                                           | [10]      |
| TFMOF                                                                                                                                         | 252.25                          | 89.9                                                        | [11]      |
| UiO-66                                                                                                                                        | 283                             | 1358                                                        | [12]      |
| In-TATAB                                                                                                                                      | 299                             | 623                                                         | [13]      |
| Fe <sub>3</sub> O <sub>4</sub> @ZTB-1                                                                                                         | 458                             | X                                                           | [14]      |
| SCNU-Z1-Cl                                                                                                                                    | 585                             | 1636                                                        | [15]      |
| UiO-66-2.7Ti                                                                                                                                  | 607                             | 929                                                         | [12]      |
| Cu-BTC-b                                                                                                                                      | 884.96                          | 1119.7                                                      | [16]      |
| Ni-MOFs                                                                                                                                       | 2046                            | 59.8                                                        | [17]      |
| GO/MOF                                                                                                                                        | 2489                            | 69.6                                                        | [17]      |

<sup>a</sup> X : not measured surface area.

**Table S5.** Zeta potential values for **S1** under the various pH conditions.

|                     | pH 2 | pH 3 | pH 4 | pH 7 | pH 11 |
|---------------------|------|------|------|------|-------|
| Zeta potential (mV) | 11.5 | 9.34 | 9.11 | 2.59 | -18.3 |

**Table S6.** pH value of aqueous H<sub>2</sub>SO<sub>4</sub> solutions before and after immersion.

|                  | H <sub>2</sub> SO <sub>4</sub> pH values |      |
|------------------|------------------------------------------|------|
| Before immersion | 2.60                                     | 3.35 |
| After immersion  | 3.41                                     | 3.53 |

The pH values of each solution were adjusted using H<sub>2</sub>SO<sub>4</sub>. The well ground samples for **S1** were immersed into aqueous H<sub>2</sub>SO<sub>4</sub> solutions at room temperature for 24 h. We investigated the pH value of the aqueous H<sub>2</sub>SO<sub>4</sub> solutions before and after immersion of **S1** at pH 2.60 and 3.35, respectively (Table S6). The pH values were measured using a pH meter.

If the pH < 3, the pH values of the H<sub>2</sub>SO<sub>4</sub> supernatant are greater than that of the solution in the absence of **S1**, which might be attributed to the protonation within the framework (Table S6). The SO<sub>4</sub><sup>2-</sup> exist as counter anions to maintain the charge balance with the acidic cationic framework. The elemental analysis and infrared spectra clearly confirm the existence of S and the stretching vibration of SO<sub>4</sub><sup>2-</sup>, respectively, for **S1** soaked in aqueous H<sub>2</sub>SO<sub>4</sub> solution (Table S7, Figure S14).<sup>18, 19</sup> As a result, the molecular structure of CR still exists as an anion because the pH value is higher than the isoelectric point of CR.

**Table S7.** Elemental analysis of **S1** and **S1** immersed in H<sub>2</sub>SO<sub>4</sub>.

|                  | C     | H    | N     | S    |
|------------------|-------|------|-------|------|
| Calculated       | 20.59 | 3.15 | 13.34 | -    |
| Before immersion | 20.61 | 2.93 | 13.22 | -    |
| After immersion  | 19.77 | 2.96 | 12.63 | 0.67 |

**Figure S15.** Infrared spectra for **S1** and **S1** immersed in H<sub>2</sub>SO<sub>4</sub>.

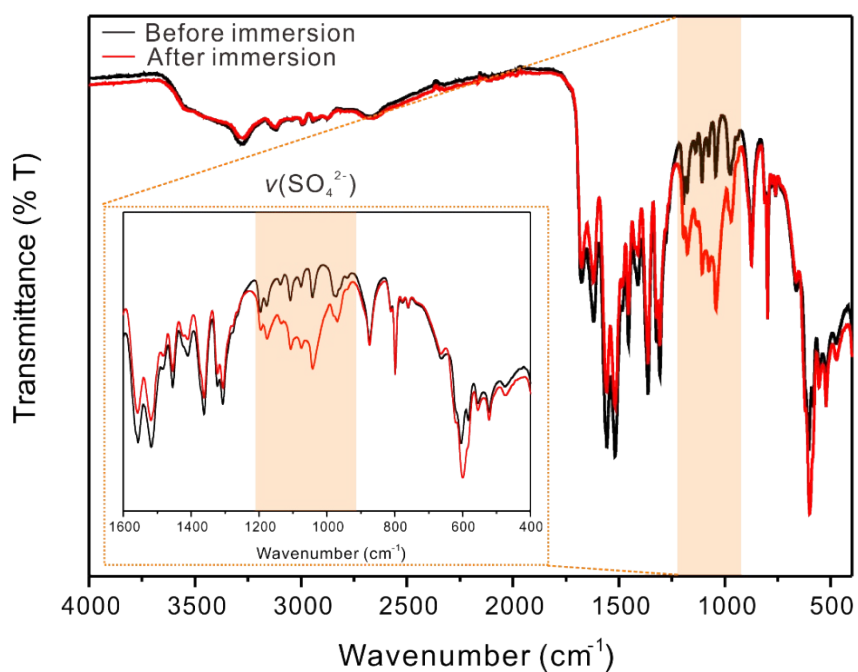

## References

1. R. Wo, Q.-L. Li, C. Zhu, Y. Zhang, G.-f. Qiao, K.-y. Lei, P. Du and W. Jiang, Preparation and Characterization of Functionalized Metal–Organic Frameworks with Core/Shell Magnetic Particles ( $\text{Fe}_3\text{O}_4@\text{SiO}_2@\text{MOFs}$ ) for Removal of Congo Red and Methylene Blue from Water Solution. *J. Chem. Eng.*, 2019, **64**, 2455-2463.
2. X. Zhang, Y. Gao, H. Liu and Z. Liu, Fabrication of porous metal–organic frameworks via a mixed-ligand strategy for highly selective and efficient dye adsorption in aqueous solution. *CrystEngComm*, 2015, **17**, 6037-6043.
3. Y. Xu, J. Jin, X. Li, Y. Han, H. Meng, J. Wu and X. Zhang, Rapid magnetic solid-phase extraction of Congo Red and Basic Red 2 from aqueous solution by ZIF-8@ $\text{CoFe}_2\text{O}_4$  hybrid composites. *J. Sep. Sci.*, 2016, **39**, 3647-3654.
4. F.-h. Wei, D. Chen, Z. Liang, S.-q. Zhao and Y. Luo, Synthesis and characterization of metal–organic frameworks fabricated by microwave-assisted ball milling for adsorptive removal of Congo red from aqueous solutions. *RSC Adv.*, 2017, **7**, 46520-46528.
5. S. A. A. Razavi and A. Morsali, Ultrasonic-Assisted Linker Exchange (USALE): A Novel Post-Synthesis Method for Controlling the Functionality, Porosity, and Morphology of MOFs. *Chem. Eur. J.*, 2019, **25**, 10876-10885.
6. M. Y. Masoomi, A. Morsali and P. C. Junk, Rapid mechanochemical synthesis of two new Cd(ii)-based metal–organic frameworks with high removal efficiency of Congo red. *CrystEngComm*, 2015, **17**, 686-692.
7. F.-h. Wei, Q.-h. Ren, Z. Liang and D. Chen, Synthesis of Graphene Oxide/Metal-Organic Frameworks Composite Materials for Removal of Congo Red from Wastewater. *ChemistrySelect*, 2019, **4**, 5755-5762.
8. R. Azhdari, S. M. Mousavi, S. A. Hashemi, S. Bahrani and S. Ramakrishna, Decorated graphene with aluminum fumarate metal organic framework as a superior non-toxic agent for efficient removal of Congo Red dye from wastewater. *J. Environ. Chem. Eng.*, 2019, **7**, 103437.
9. M. del Rio, G. Turnes Palomino and C. Palomino Cabello, Metal–Organic Framework@Carbon Hybrid Magnetic Material as an Efficient Adsorbent for Pollutant Extraction. *ACS Appl. Mater. Interfaces*, 2020, **12**, 6419-6425.
10. J. Zolgharnein, S. Dermanaki Farahani, M. Bagtash and S. Amani, Application of a new metal-organic framework of  $[\text{Ni}_2\text{F}_2(4,4'\text{-bipy})_2(\text{H}_2\text{O})_2](\text{VO}_3)_2 \cdot 8\text{H}_2\text{O}$  as an efficient adsorbent for removal of Congo red dye using experimental design optimization. *Environ. Res.*, 2020, **182**, 109054.
11. J. Liu, H. Yu and L. Wang, Superior absorption capacity of tremella like ferrocene based metal-organic framework in removal of organic dye from water. *J. Hazard. Mater.*, 2020, **392**, 122274.
12. Y. Han, M. Liu, K. Li, Q. Sun, W. Zhang, C. Song, G. Zhang, Z. Conrad Zhang and X. Guo, In



- situ synthesis of titanium doped hybrid metal–organic framework UiO-66 with enhanced adsorption capacity for organic dyes. *Inorg. Chem. Front.*, 2017, **4**, 1870-1880.
13. X. Liu, B. Liu, J. F. Eubank and Y. Liu, Highly effective and fast removal of anionic carcinogenic dyes via an In<sub>3</sub>-cluster-based cationic metal–organic framework with nitrogen-rich ligand. *Mater. Chem. Front.*, 2020, **4**, 182-188.
  14. L.-J. Han, F.-Y. Ge, G.-H. Sun, X.-J. Gao and H.-G. Zheng, Effective adsorption of Congo red by a MOF-based magnetic material. *Dalton Trans.*, 2019, **48**, 4650-4656.
  15. S.-Q. Deng, X.-J. Mo, S.-R. Zheng, X. Jin, Y. Gao, S.-L. Cai, J. Fan and W.-G. Zhang, Hydrolytically Stable Nanotubular Cationic Metal–Organic Framework for Rapid and Efficient Removal of Toxic Oxo-Anions and Dyes from Water. *Inorg. Chem.*, 2019, **58**, 2899-2909.
  16. Y. Luo, D. Chen, F. Wei and Z. Liang, Synthesis of Cu-BTC Metal-Organic Framework by Ultrasonic Wave-Assisted Ball Milling with Enhanced Congo Red Removal Property. *ChemistrySelect*, 2018, **3**, 11435-11440.
  17. S. Zhao, D. Chen, F. Wei, N. Chen, Z. Liang and Y. Luo, Removal of Congo red dye from aqueous solution with nickel-based metal-organic framework/graphene oxide composites prepared by ultrasonic wave-assisted ball milling. *Ultrason. Sonochem.*, 2017, **39**, 845-852.
  18. X.-Y. Dong, J.-J. Li, Z. Han, P.-G. Duan, L.-K. Li and S.-Q. Zang, Tuning the functional substituent group and guest of metal–organic frameworks in hybrid membranes for improved interface compatibility and proton conduction. *J. Mater. Chem. A.*, 2017, **5**, 3464-3474.
  19. G. Socrates, *Infrared and Raman characteristic group frequencies: tables and charts*, John Wiley & Sons, 2004, pp. 290-291.
